# Supplementary material for: Strontium- and Cobalt-Doped Multicomponent Mesoporous Bioactive Glasses (MBGs) for Potential Use in Bone Tissue Engineering Applications
Source: MDPI journal article supplement (doi:10.3390/ma13061348), 2020-03-16
Supplement: s1 [file s1]

Article

# Strontium- and Cobalt-Doped Multicomponent Mesoporous Bioactive Glasses (MBGs) for Potential Use in Bone Tissue Engineering Applications

Farzad Kermani <sup>1</sup>, Sahar Mollazadeh Beidokhti <sup>1</sup>, Francesco Baino <sup>2,\*</sup>, Zahra Gholamzadeh-Virany <sup>3</sup>, Masoud Mozafari <sup>4</sup> and Saeid Kargozar <sup>5,\*</sup>

<sup>1</sup> Department of Materials Engineering, Faculty of Engineering, Ferdowsi University of Mashhad (FUM), Azadi Sq., Mashhad 917794-8564 Iran; farzadkermani73@gmail.com (F.K.); mollazadeh.b@um.ac.ir (S.M.B)

<sup>2</sup> Institute of Materials Physics and Engineering, Applied Science and Technology Department, Politecnico di Torino, Corso Duca degli Abruzzi 24, 10129 Torino, Italy

<sup>3</sup> Department of Biology, Faculty of Sciences, Islamic Azad University-Mashhad Branch, Mashhad 917794-8564, Iran; zahragholamzadeh650@gmail.com

<sup>4</sup> Department of Tissue Engineering & Regenerative Medicine, Faculty of Advanced Technologies in Medicine, Iran University of Medical Sciences (IUMS), Tehran 1449614535, Iran; mozafari.masoud@gmail.com

<sup>5</sup> Tissue Engineering Research Group (TERG), Department of Anatomy and Cell Biology, School of Medicine, Mashhad University of Medical Sciences, Mashhad 917794-8564, Iran

\* Correspondence: francesco.baino@polito.it (F.B.); Tel.: +39 011 090 4668 (F.B.), kargozarsaeid@gmail.com (S.K.); Tel.: +98-513-800-2539 (S.K.).

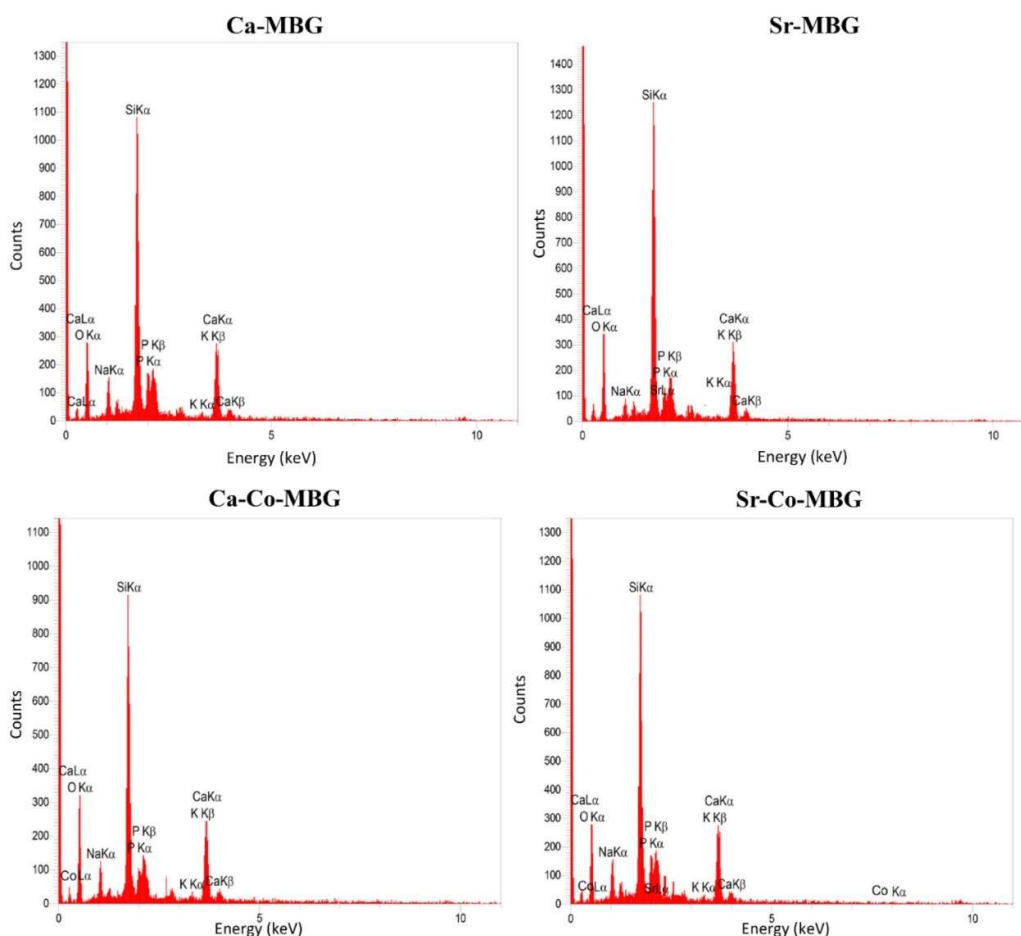

**Figure 1.** Compositional analyses (EDS) performed on the MBGs after calcination.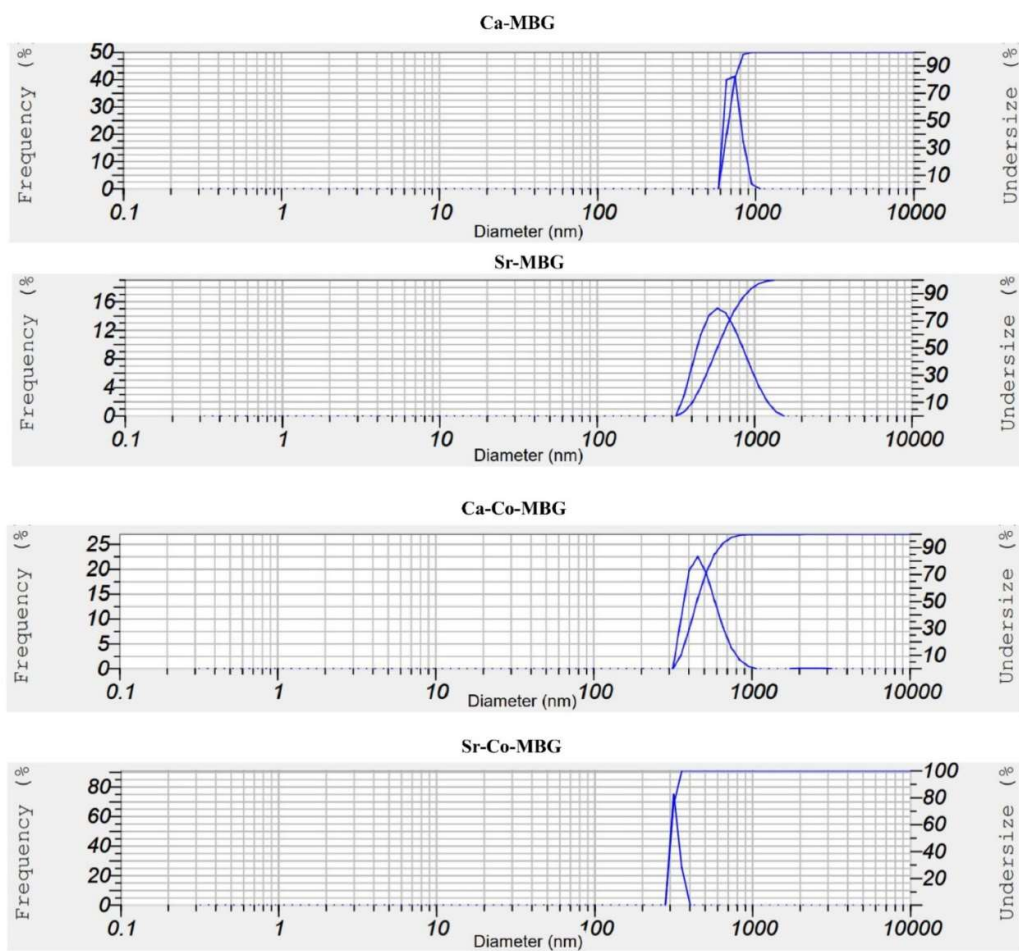**Figure 2.** Particle size distributions assessed by DLS.
